# Supplementary material for: Plant Lipid Bodies Traffic on Actin to Plasmodesmata Motorized by Myosin XIs
Source: MDPI journal article supplement (doi:10.3390/ijms21041422), 2020-02-20
Supplement: s1 [file s1]

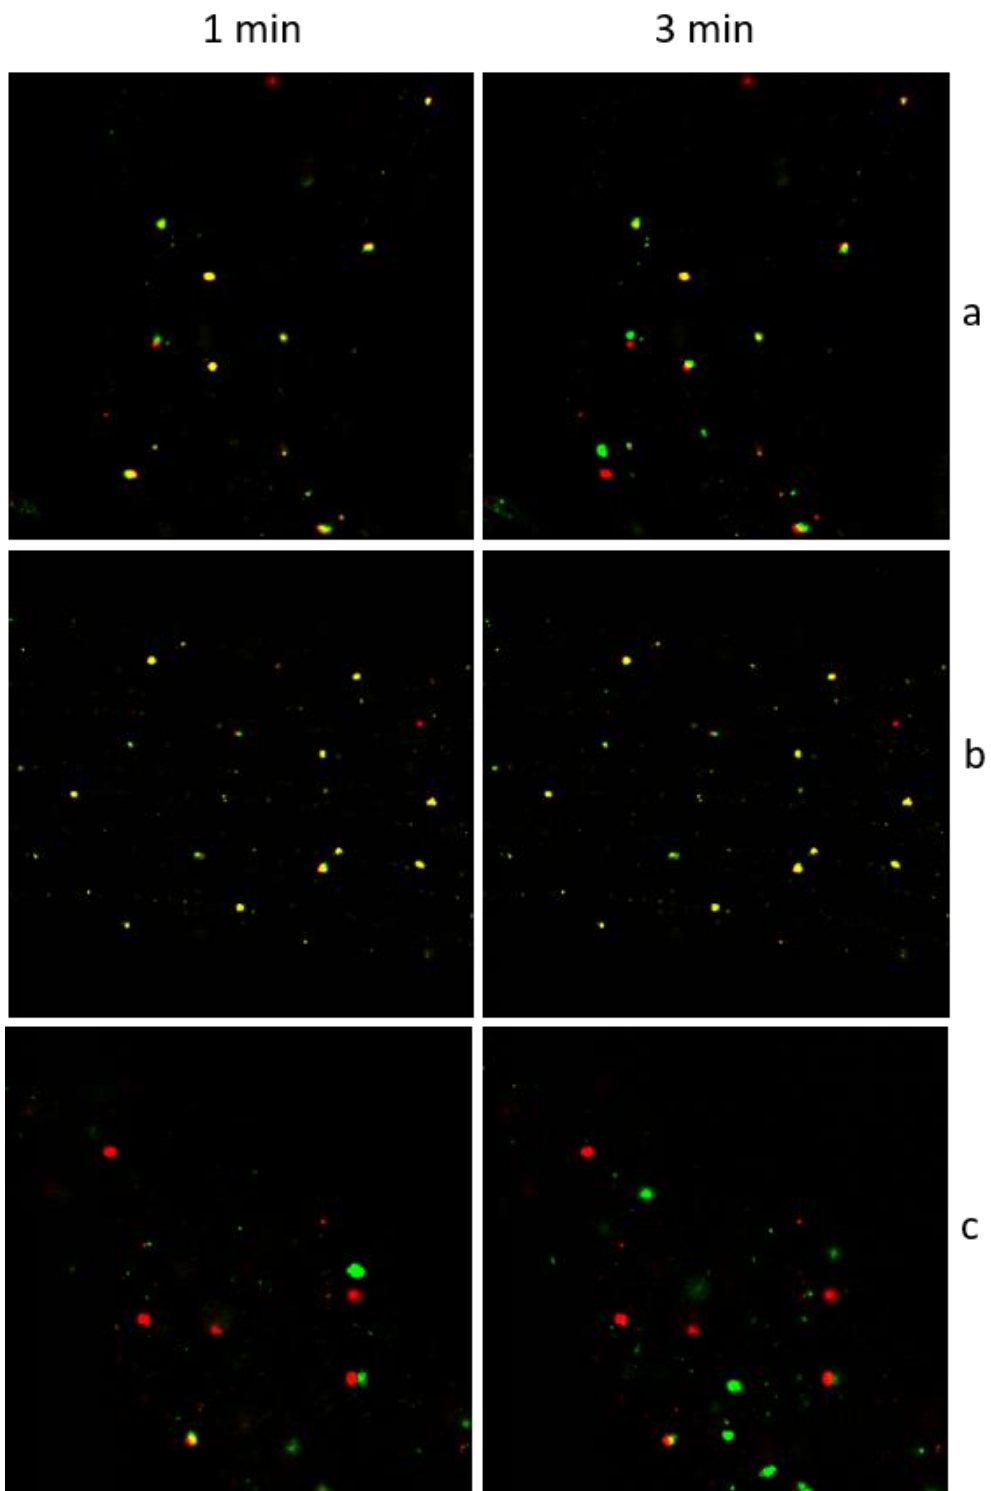

Figure S1. **Washing with water restored the cytoD mediated inhibition of LB motility.** Green/red overlay of two time lapse confocal images (1 and 3 minutes) of OLE6-eGFP #1 main root. Seedlings were treated with Control (a), 40 $\mu$ M cytoD for 15 minutes (b) and washed with water after cytoD treatment (c). Note the near complete inhibition of LB movement (demonstrated by near-complete overlay of the two color signals) in cytoD treatment (b) and not in the water washed sample (c).

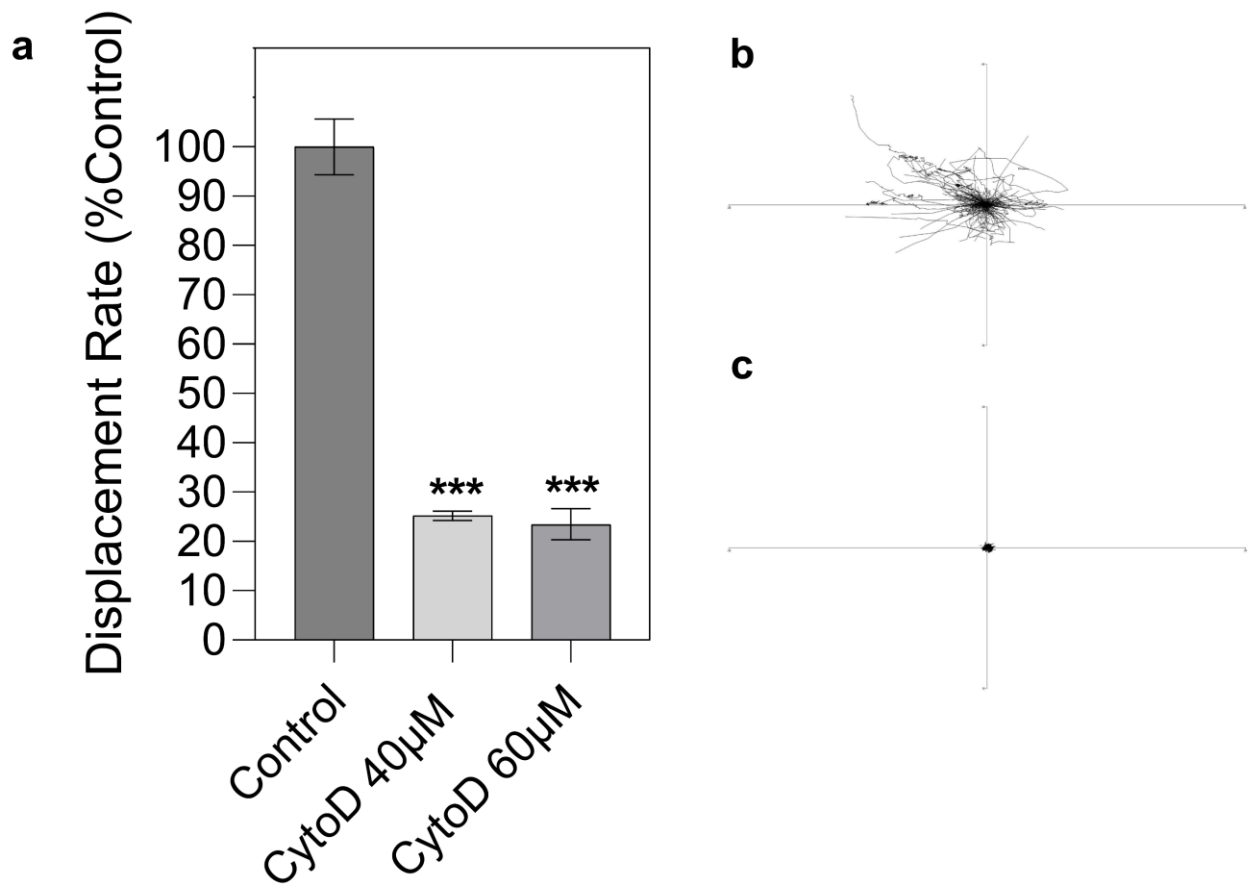

Figure S2. **Movement of lipid bodies in PtOLE6-eGFP overexpressing plants treated with different concentrations of CytoD.** (a) Mean displacement rates of the lipid bodies in leaf epidermal cells of PtOLE6-eGFP #1 treated with different concentrations of CytoD, expressed as percentage of those in the control treatment (0.45  $\mu\text{m}/\text{sec}$ ) ( $\pm\text{SE}$ ). Representative tracks of lipid bodies present in the control (b), 60 $\mu\text{M}$  cytoD (c) in one time series obtained using the CLSM and plotted to a common origin. Asterisks indicate significant differences compared to control and between the treatments (\*\*\* $P < 0.001$ ).

| Protein                  | Gene abb.   | Locus name v3.0  | Forward 5'-3'            | Reverse 5'-3'          |
|--------------------------|-------------|------------------|--------------------------|------------------------|
| <b>OLEOSIN genes</b>     |             |                  |                          |                        |
| OLEOSIN1                 | <i>OLE1</i> | Potri.018G057800 | GGTGCMGCACTGTTGGTGTT     | GAATTGGTGTAGCCACGATCAA |
| OLEOSIN2                 | <i>OLE2</i> | Potri.015G082100 | TGGATGGCCAGCTATATTCGA    | GTGTCCTCCGTTTCGCTTGA   |
| OLEOSIN3                 | <i>OLE3</i> | Potri.017G071800 | CCTAGTAGGCACCCTGATCG     | GAGGTCACTGCAAACCCAAT   |
| OLEOSIN4                 | <i>OLE4</i> | Potri.012G083400 | TTAGCATCCGGTGCTTTTGG     | TGATCAAGCTCTGCGAATGG   |
| OLEOSIN5                 | <i>OLE5</i> | Potri.012G059400 | TCGGACCAGGTCGATTATGC     | CATACTCCCTGGCGTAGTCCTT |
| OLEOSIN6                 | <i>OLE6</i> | Potri.006G234900 | TTATGCTGGAGGGAGGATAGCA   | TCTCACATTCTGACCGCACTCT |
| OLEOSIN7                 | <i>OLE7</i> | Potri.001G345800 | GTCCCAGCTGCCCTTGTAATAG   | AGGACCCTGTCAGTCCGAAA   |
| OLEOSIN8                 | <i>OLE8</i> | Potri.001G080000 | TTGCTGGTCATATTCAGTCCAGTT | AGGCCAAGAACCCCATAGC    |
| OLEOSIN9                 | <i>OLE9</i> | Potri.003G150600 | ACCGGTGGGTCTCTTTTAGTTGT  | ATGGAGTGGCTACGGTCAACA  |
| <b>Housekeeping gene</b> |             |                  |                          |                        |
| ACTIN                    | <i>ACT</i>  | Potri.001G309500 | CGATGCCGAGGATATTCAAC     | ACCAGTGTGTCTTGGTCTACCC |

Table S1. *P. trichocarpa* genes, identifiers and primer pairs used for qPCR analysis.

| S.No | Plant Material    | Treatment  | N <sup>1</sup> | N <sup>2</sup> | Mean Velocity ±SD (µm/sec) | Mean Displacement Rate ±SD (µm/sec) |
|------|-------------------|------------|----------------|----------------|----------------------------|-------------------------------------|
| 1    | OLE6-eGFP #1 Leaf | Control    | 12             | 2909           | 0.546 ± 0.106              | 0.456 ± 0.089                       |
| 2    | OLE6-eGFP #1 Leaf | CytoD 40µM | 14             | 4327           | 0.201 ± 0.024              | 0,115 ± 0.016                       |
| 3    | OLE6-eGFP #1 Leaf | Oryzalin   | 11             | 5639           | 0.506 ± 0.133              | 0.364 ± 0.109                       |
| 4    | OLE6-eGFP #1 Leaf | BFA        | 16             | 6898           | 0.582 ± 0.227              | 0.464 ± 0.171                       |
| 5    | OLE6-eGFP #1 Root | Control    | 18             | 15638          | 0.580 ± 0.280              | 0.376 ± 0.181                       |
| 6    | OLE6-eGFP #2 Leaf | Control    | 14             | 5762           | 0.473 ± 0.103              | 0.366 ± 0.084                       |
| 7    | OLE6-eGFP #2 Root | Control    | 13             | 7973           | 0.512 ± 0.228              | 0.325 ± 0.177                       |
| 8    | 3KO #1 Leaf       | Control    | 23             | 6041           | 0.188 ± 0,027              | 0,109 ± 0.019                       |
| 9    | 3KO #2 Leaf       | Control    | 16             | 5260           | 0.197 ± 0.035              | 0,115 ± 0.022                       |
| 10   | OLE6-eGFP #1 Leaf | CytoD 60µM | 12             | 2613           | 0.201 ± 0.069              | 0,117 ± 0.058                       |

N<sup>1</sup>: Number of analysed videos

N<sup>2</sup>: Number of Analyzed Lipid body count (in N<sup>1</sup>)

OLE6-GFP #1: OLE6-eGFP overexpressor in *Columbia-0* background

OLE6-GFP #2: OLE6-eGFP overexpressor in *Columbia-0* background

3KO #1: OLE6-eGFP overexpressor in myosin 3 knockout background

3KO #2: OLE6-eGFP overexpressor in myosin 3 knockout background

Table S2. **Lipid body movement data.**

| AT Gene IDs | Protein Name (Fang et al 2014) | Other names |
|-------------|--------------------------------|-------------|
| At3g01570   | OLE-S1                         |             |
| At3g27660   | OLE-S2                         | OLE4        |
| At4g25140   | OLE-S3                         | OLE1        |
| At5g40420   | OLE-S4                         | OLE2        |
| At5g51210   | OLE-S5                         | OLE3        |
| At1g48990   | OLE-SM1                        |             |
| At3g18570   | OLE-SM2                        |             |
| At2g25890   | OLE-SM3                        |             |

Table S3. *A.thaliana* genes, identifiers used for the phylogenetic analysis.
