# Supplementary material for: Plant Lipid Bodies Traffic on Actin to Plasmodesmata Motorized by Myosin XIs
Source: Int J Mol Sci. 2020 Feb 20;21(4):1422. doi: 10.3390/ijms21041422 (PMC7073070; doi:10.3390/ijms21041422)
Supplement: Supplementary file 1 [file ijms-21-01422-s001.zip]

Archive with 13 entries (13 files):
- Supplementary Figures and Tables.pdf
- Supplementary Movies/Movie S1.wmv
- Supplementary Movies/Movie S10.wmv
- Supplementary Movies/Movie S11.wmv
- Supplementary Movies/Movie S2.wmv
- Supplementary Movies/Movie S3.wmv
- Supplementary Movies/Movie S4.wmv
- Supplementary Movies/Movie S5.wmv
- Supplementary Movies/Movie S6.wmv
- Supplementary Movies/Movie S7.wmv
- Supplementary Movies/Movie S8.wmv
- Supplementary Movies/Movie S9.wmv
- Supplementary Movies/Supplementary Movie legends.pdf
